# Supplementary material
Source: Springer Nature journal article supplement (https://www.springermedizin.de/resource/supplementary/12936_2012_2124_MOESM3_ESM.pdf/9542750)

- ◆ negative control
- +/+
- ▲ *kdr-w/kdr-w*
- *kdr-w/+*

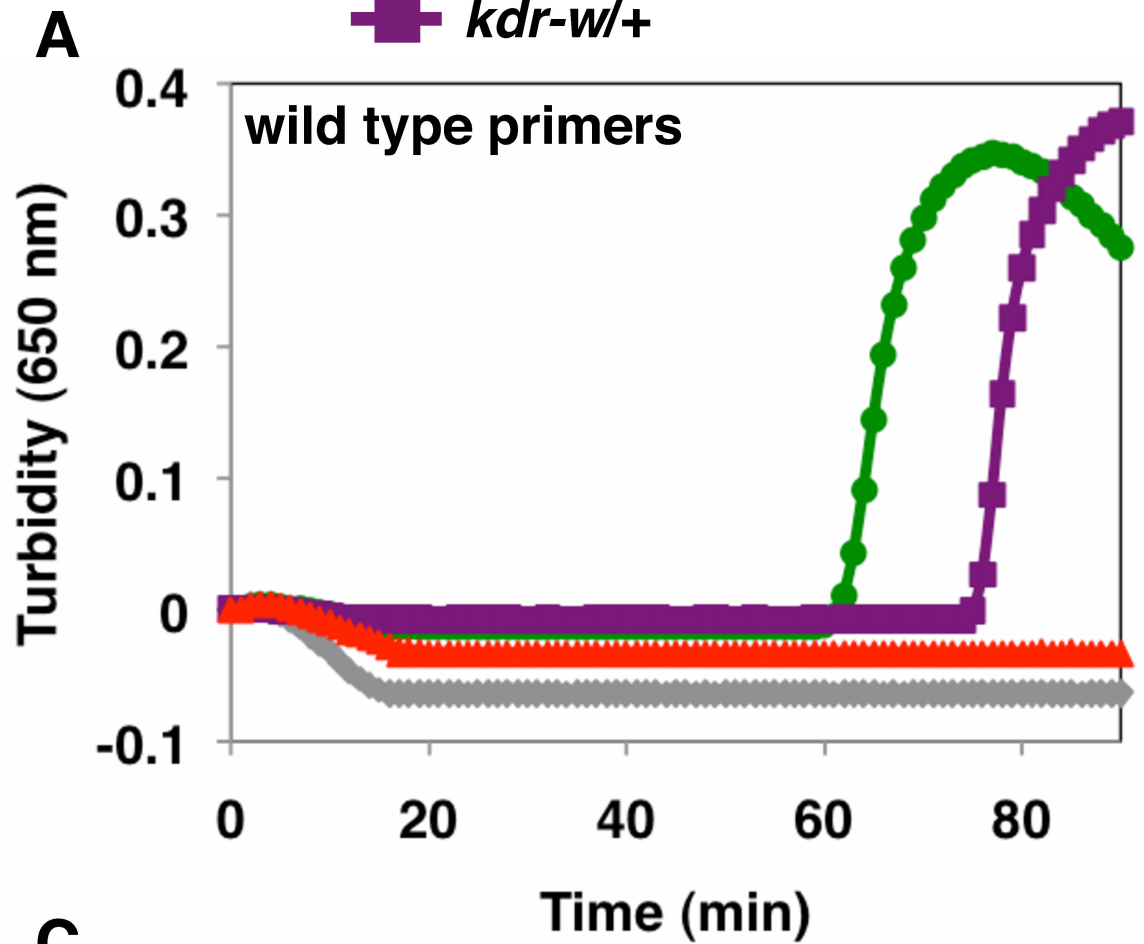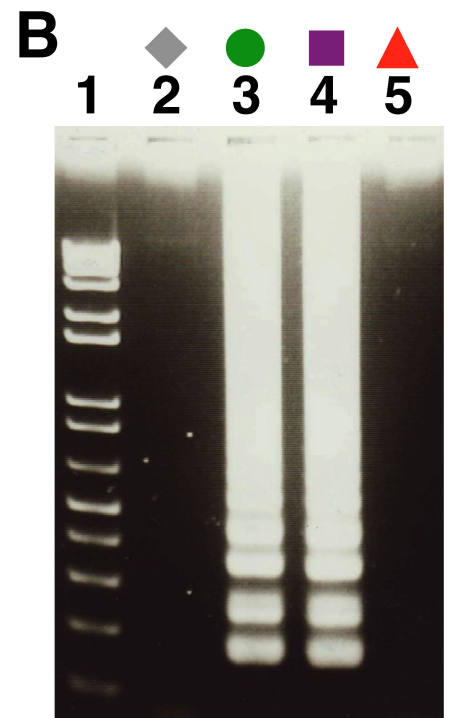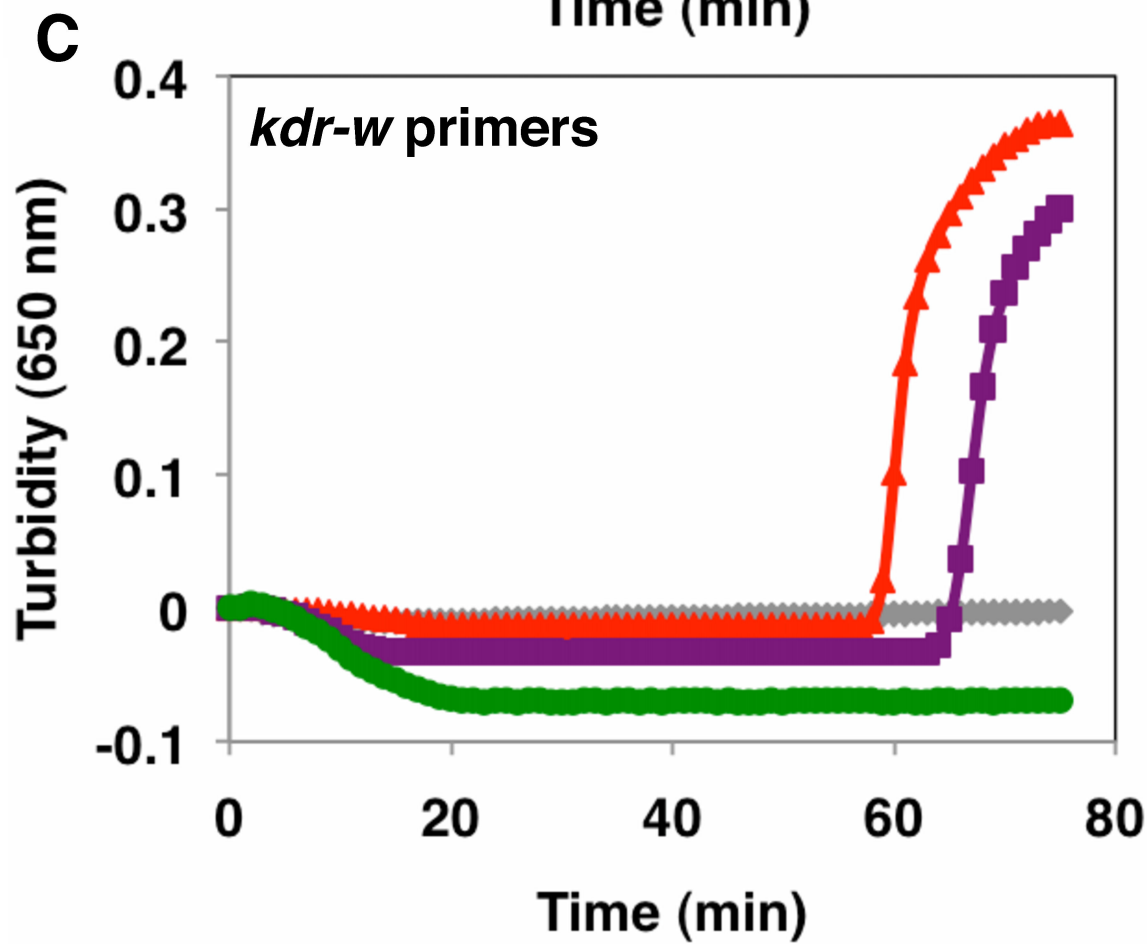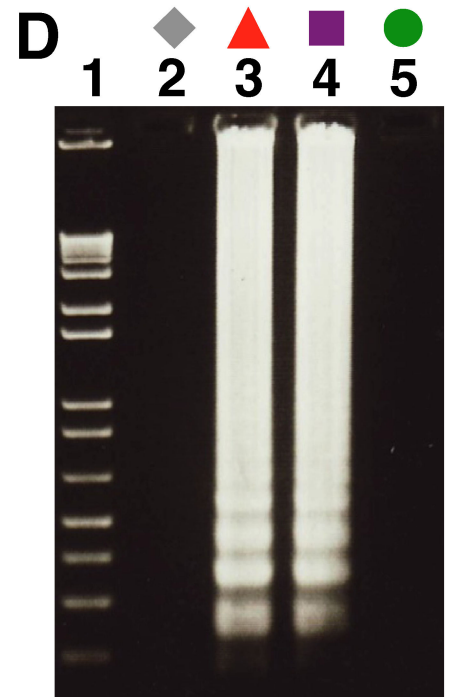

Supplement: MOESM3 [file 9542750]
